# Supplementary material for: An antisense RNA capable of modulating the expression of the tumor suppressor microRNA-34a
Source: PubMed Central journal article supplement (PMC6030072; doi:10.1038/s41419-018-0777-5), 2018-07-03
Supplement: 41419_2018_777_MOESM2_ESM.pdf [file 41419_2018_777_MOESM2_ESM.pdf]

## Supplementary Document 2

---

### Figure 1b

---

| name               | sequence                        |
|--------------------|---------------------------------|
| miR34a asRNA F1    | AGC GGC ATC TCC TCC ACC TGA AA  |
| miR34a asRNA R1    | TTG CCT CGT GAG TCC AAG GAG AAT |
| miR34a HG F        | TCT GCT CCA GTG GCT GAT GAG AAA |
| miR34a HG R        | GTT CAC TGG CCT CAA AGT TGG CAT |
| $\beta$ -actin Fwd | AGG TCA TCA CCA TTG GCA ATG AG  |
| $\beta$ -actin Rev | CTT TGC GGA TGT CCA CGT CA      |

### Figure 1d

---

| name                | sequence                                                                                              |
|---------------------|-------------------------------------------------------------------------------------------------------|
| miR34a<br>asRNA F10 | ACG CGT CTC TCC AGC CCG GGA T                                                                         |
| polyT T7<br>FAM     | CAG TGA ATT GTA ATA CGA CTC ACT ATA GGG ACA TCC GTA GCT CGT CCA<br>GGA CCC TTT TTT TTT TTT TTT TTT VN |
| miR34a<br>asRNA F1  | AGC GGC ATC TCC TCC ACC TGA AA                                                                        |
| FAM primer          | CCG TAG CTC GTC CAG GAC CC                                                                            |

### Figure 2a

---

| <b>name</b>  | <b>sequence</b>                 |
|--------------|---------------------------------|
| β-actin Fwd  | AGG TCA TCA CCA TTG GCA ATG AG  |
| β-actin Rev  | CTT TCG GGA TGT CCA CGT CA      |
| miR34a HG F  | TCT GCT CCA GTG GCT GAT GAG AAA |
| miR34a HG R  | GTT CAC TGG CCT CAA AGT TGG CAT |
| miR34a AS F1 | AGC GGC ATC TCC TCC ACC TGA AA  |
| miR34a AS R1 | TTG CCT CGT GAG TCC AAG GAG AAT |

## Figure 2b

---

| <b>name</b>  | <b>sequence</b>                 |
|--------------|---------------------------------|
| β-actin Fwd  | AGG TCA TCA CCA TTG GCA ATG AG  |
| β-actin Rev  | CTT TCG GGA TGT CCA CGT CA      |
| miR34a HG F  | TCT GCT CCA GTG GCT GAT GAG AAA |
| miR34a HG R  | GTT CAC TGG CCT CAA AGT TGG CAT |
| miR34a AS F1 | AGC GGC ATC TCC TCC ACC TGA AA  |
| miR34a AS R1 | TTG CCT CGT GAG TCC AAG GAG AAT |

## Figure 2c

---

### QPCR primers

| <b>name</b>  | <b>sequence</b>                 |
|--------------|---------------------------------|
| β-actin Fwd  | AGG TCA TCA CCA TTG GCA ATG AG  |
| β-actin Rev  | CTT TCG GGA TGT CCA CGT CA      |
| miR34a HG F  | TCT GCT CCA GTG GCT GAT GAG AAA |
| miR34a HG R  | GTT CAC TGG CCT CAA AGT TGG CAT |
| miR34a AS F1 | AGC GGC ATC TCC TCC ACC TGA AA  |
| miR34a AS R1 | TTG CCT CGT GAG TCC AAG GAG AAT |

## Figure 2d

---

| name               | sequence                       |
|--------------------|--------------------------------|
| Luc setII F        | AAG ATT CAA AGT GCG CTG CTG    |
| Luc setII R        | TTG CCT GAT ACC TGG CAG ATG    |
| Renilla pBiDir F1  | TAA CGC GGC CTC TTC TTA TTT    |
| Renilla pBiDir R1  | GAT TTG CCT GAT TTG CCC ATA    |
| $\beta$ -actin Fwd | AGG TCA TCA CCA TTG GCA ATG AG |
| $\beta$ -actin Rev | CTT TGC GGA TGT CCA CGT CA     |

## Figure 2e

---

| name               | sequence                       |
|--------------------|--------------------------------|
| Luc setII F        | AAG ATT CAA AGT GCG CTG CTG    |
| Luc setII R        | TTG CCT GAT ACC TGG CAG ATG    |
| Renilla pBiDir F1  | TAA CGC GGC CTC TTC TTA TTT    |
| Renilla pBiDir R1  | GAT TTG CCT GAT TTG CCC ATA    |
| $\beta$ -actin Fwd | AGG TCA TCA CCA TTG GCA ATG AG |
| $\beta$ -actin Rev | CTT TGC GGA TGT CCA CGT CA     |

## Figure 3a

---

### Cloning primers

| name                   | sequence                        |
|------------------------|---------------------------------|
| miR34aAS cloning F4    | ACG CGT CTC TCC AGC CCG GGA T   |
| miR34aAS cloning Ex3_1 | AAT GAT GGC CGC AAC TAA TGA CGG |

### QPCR primers

| <b>name</b>  | <b>sequence</b>                 |
|--------------|---------------------------------|
| β-actin Fwd  | AGG TCA TCA CCA TTG GCA ATG AG  |
| β-actin Rev  | CTT TCG GGA TGT CCA CGT CA      |
| miR34a AS F1 | AGC GGC ATC TCC TCC ACC TGA AA  |
| miR34a AS R1 | TTG CCT CGT GAG TCC AAG GAG AAT |

## Figure 3d

---

| <b>name</b>    | <b>sequence</b>                 |
|----------------|---------------------------------|
| miR34a ChIP F1 | AAA GTT TGC AAA GAA GGA GGC GGG |
| miR34a ChIP R1 | AGG GAA GAA AGA ACT AGC CGA GCA |

## Supplementary Figure 2a

---

| <b>name</b>   | <b>sequence</b>                 |
|---------------|---------------------------------|
| miR34a AS F10 | ACG CGT CTC TCC AGC CCG GGA T   |
| miR34a AS F11 | ATC TGC GTG GTC ACC GAG AAG CA  |
| miR34a AS F12 | CGC ACG GAC TGA GAA ACA CAA G   |
| miR34a AS F13 | ACG GAG GCT ACA CAA TTG AAC AGG |
| miR34a AS F14 | AGG GAA GAA AGA ACT AGC CGA GCA |
| miR34a AS F15 | CAT TTG CTG CAA TAT CAC CGT GGC |
| miR34a AS R1  | TTG CCT CGT GAG TCC AAG GAG AAT |

## Supplementary Figure 2b

---

| <b>name</b>       | <b>sequence</b>                 |
|-------------------|---------------------------------|
| miR34a AS F1      | AGC GGC ATC TCC TCC ACC TGA AA  |
| miR34a AS R1      | TTG CCT CGT GAG TCC AAG GAG AAT |
| miR34a AS int1 R1 | TGC GCA AAC TAC GCG CTC T       |
| miR34a HG F       | TCT GCT CCA GTG GCT GAT GAG AAA |
| miR34a HG R       | GTT CAC TGG CCT CAA AGT TGG CAT |
| β-actin Fwd       | AGG TCA TCA CCA TTG GCA ATG AG  |
| β-actin Rev       | CTT TGC GGA TGT CCA CGT CA      |
| U48 F             | AGT GAT GAT GAC CCC AGG TA      |
| U48 R             | GGT CAG AGC GCT GCG GTG AT      |

## Supplementary Figure 2c

---

| <b>name</b>      | <b>sequence</b>                 |
|------------------|---------------------------------|
| miR34a AS F12    | AAA CAC AAG CGT TTA CCT GGG TGC |
| miR34a AS R1     | TTG CCT CGT GAG TCC AAG GAG AAT |
| miR34a AS R2     | ATA GGT TCA TTT GCC CGA TGT GCC |
| miR34a AS R3     | CCA CAG CTG TTG CTT CTG AAT GCT |
| miR34a AS Ex3 R1 | TGA TGG CCG CAA CTA ATG ACG GAT |

## Supplementary Figure 3c

---

| <b>name</b>        | <b>sequence</b>                |
|--------------------|--------------------------------|
| Luc setII F        | AAG ATT CAA AGT GCG CTG CTG    |
| Luc setII R        | TTG CCT GAT ACC TGG CAG ATG    |
| Renilla pBiDir F1  | TAA CGC GGC CTC TTC TTA TTT    |
| Renilla pBiDir R1  | GAT TTG CCT GAT TTG CCC ATA    |
| $\beta$ -actin Fwd | AGG TCA TCA CCA TTG GCA ATG AG |
| $\beta$ -actin Rev | CTT TGC GGA TGT CCA CGT CA     |

## Supplementary Figure 4a

---

### Cloning primers

| <b>name</b>            | <b>sequence</b>                 |
|------------------------|---------------------------------|
| miR34aAS cloning F4    | ACG CGT CTC TCC AGC CCG GGA T   |
| miR34aAS cloning Ex3_1 | AAT GAT GGC CGC AAC TAA TGA CGG |

### QPCR primers

| <b>name</b>        | <b>sequence</b>                 |
|--------------------|---------------------------------|
| $\beta$ -actin Fwd | AGG TCA TCA CCA TTG GCA ATG AG  |
| $\beta$ -actin Rev | CTT TCG GGA TGT CCA CGT CA      |
| miR34a AS F1       | AGC GGC ATC TCC TCC ACC TGA AA  |
| miR34a AS R1       | TTG CCT CGT GAG TCC AAG GAG AAT |

## Supplementary Figure 4c

---

| <b>name</b>        | <b>sequence</b>                |
|--------------------|--------------------------------|
| CCND1 Fwd          | CGT GGC CTC TAA GAT GAA GG     |
| CCND1 Rev          | CTG GCA TTT TGG AGA GGA AG     |
| $\beta$ -actin Fwd | AGG TCA TCA CCA TTG GCA ATG AG |
| $\beta$ -actin Rev | CTT TGC GGA TGT CCA CGT CA     |
